# Supplementary material for: Duplicated flavonoid 3’-hydroxylase and flavonoid 3’, 5’-hydroxylase genes in barley genome
Source: PeerJ. 2019 Jan 15;7:e6266. doi: 10.7717/peerj.6266 (PMC6338099; doi:10.7717/peerj.6266)
Supplement: File S1 [file peerj-07-6266-s001.xlsx]

## Sheet: значения
Additional file 1.	The raw data of expression of F3'H and F3'5'H genes in barley cv Bowman and Bowman NILs contrasting for anthocyanin pigmentation.
	Sample Name	Target Name	Quantity Mean	PROPORTION		Target Name	Quantity Mean	NORMALIZAISED	means	stdev	st error	Target Name	Quantity Mean	NORMALIZAISED	means	stdev	st error	Target Name	Quantity Mean	NORMALIZAISED	means	stdev	st error	Target Name	Quantity Mean	NORMALIZAISED	means	stdev	st error	Target Name	Quantity Mean	NORMALIZAISED	means	stdev	st error
aleurone layer	Bw1	Ubi	0.0891845	1		F3'5'H-4	0.0722887	0.0722887	0.0776218	0.0171788	0.0099182	F3'5'H-1	0.570599	0.570599	0.42446	0.142631	0.0823479	F3'H-1	0.140943	0.140943	0.159068	0.0355684	0.0205355	F3'5'H-2	1.25958	1.25958	1.18288	0.146252	0.0844385	F3'H-2	0	0	0	0	0
	Bw2	Ubi	0.182425	2.04549		F3'5'H-4	0.130383	0.063742				F3'5'H-1	0.584226	0.285617				F3'H-1	0.278622	0.136213				F3'5'H-2	2.07459	1.01423				F3'H-2	0	0
	Bw3	Ubi	0.121987	1.36781		F3'5'H-4	0.132451	0.0968347				F3'5'H-1	0.570599	0.417162				F3'H-1	0.273627	0.200048				F3'5'H-2	1.74372	1.27483				F3'H-2	0	0
	Ba1	Ubi	0.0482449	0.540956		F3'5'H-4	0.0160756	0.0297171	0.0393549	0.00891166	0.00514515	F3'5'H-1	7.65483	14.1505	15.1578	0.876072	0.5058	F3'H-1	0.124198	0.229589	0.169053	0.0557538	0.0321895	F3'5'H-2	0.0206993	0.0382643	0.15071	0.209161	0.120759	F3'H-2	0	0	0	0	0
	Ba2	Ubi	0.0618924	0.693982		F3'5'H-4	0.032823	0.0472966				F3'5'H-1	10.8126	15.5805				F3'H-1	0.0831462	0.11981				F3'5'H-2	0.27207	0.392042				F3'H-2	0	0
	Ba3	Ubi	0.0447103	0.245088		F3'5'H-4	0.0100611	0.041051				F3'5'H-1	3.85828	15.7424				F3'H-1	0.0386651	0.15776				F3'5'H-2	0.00534861	0.0218232				F3'H-2	0	0
pericarp	Bw1	Ubi	0.304344	3.41253		F3'5'H-4	0.153387	0.0449482	0.0749457	0.0300557	0.0173527	F3'5'H-1	0	0	0	0	0	F3'H-1	0.598882	0.175495	0.174863	0.0698666	0.0403375	F3'5'H-2	2.9785	0.872812	1.46587	0.541425	0.312592	F3'H-2	0	0	0	0	0
	Bw2	Ubi	0.260119	2.91664		F3'5'H-4	0.218251	0.0748297				F3'5'H-1	0	0				F3'H-1	0.305323	0.104683				F3'5'H-2	5.63998	1.93372				F3'H-2	0	0
	Bw3	Ubi	0.238546	1.30764		F3'5'H-4	0.137379	0.105059				F3'5'H-1	0	0				F3'H-1	0.319602	0.244412				F3'5'H-2	2.08055	1.59108				F3'H-2	0	0
	Plp1	Ubi	0.282565	3.16832		F3'5'H-4	0.0541784	0.0171	0.0588211	0.0801732	0.046288	F3'5'H-1	0	0	0	0	0	F3'H-1	1.22939	0.388025	0.568691	0.195622	0.112942	F3'5'H-2	0.885527	0.279494	0.186811	0.140692	0.0812283	F3'H-2	0	0	0	0	0
	Plp2	Ubi	0.489653	5.49033		F3'5'H-4	0.0445359	0.00811169				F3'5'H-1	0	0				F3'H-1	2.97357	0.541601				F3'5'H-2	0.136823	0.0249206				F3'H-2	0	0
	Plp3	Ubi	0.0633866	0.347466		F3'5'H-4	0.0525547	0.151252				F3'5'H-1	0	0				F3'H-1	0.269788	0.776446				F3'5'H-2	0.0889576	0.256018				F3'H-2	0	0
lemma	Bw1	Ubi	0.342782	3.84351		F3'5'H-4	0.0669492	0.0174187	0.0291798	0.0306513	0.0176966	F3'5'H-1	0	0	0	0	0	F3'H-1	0.0611524	0.0159106	0.0320267	0.0336145	0.0194073	F3'5'H-2	0.436376	0.113536	0.0877822	0.0781553	0.045123	F3'H-2	0	0	0	0	0
	Bw2	Ubi	0.259781	2.91285		F3'5'H-4	0.186335	0.0639699				F3'5'H-1	0	0				F3'H-1	0.205836	0.0706647				F3'5'H-2	0.436376	0.149811				F3'H-2	0	0
	Bw3	Ubi	0.725411	8.13383		F3'5'H-4	0.0500291	0.00615074				F3'5'H-1	0	0				F3'H-1	0.0773095	0.00950469				F3'5'H-2	0	0				F3'H-2	0	0
	Plp1	Ubi	0.180977	2.02925		F3'5'H-4	0.0837901	0.0412913	0.0531323	0.0193523	0.0111731	F3'5'H-1	0	0	0	0	0	F3'H-1	0.324445	0.159885	0.125982	0.0293984	0.0169732	F3'5'H-2	0.162224	0.0799429	0.0266476	0.0461551	0.0266476	F3'H-2	0	0	0	0	0
	Plp2	Ubi	0.0429953	0.482094		F3'5'H-4	0.0205569	0.0426408				F3'5'H-1	0	0				F3'H-1	0.0518407	0.107532				F3'5'H-2	0	0				F3'H-2	0	0
	Plp3	Ubi	0.139892	1.56857		F3'5'H-4	0.118372	0.0754648				F3'5'H-1	0	0				F3'H-1	0.173375	0.11053				F3'5'H-2	0	0				F3'H-2	0	0
stem	Bw1	Ubi	0.134836	1.51188		F3'5'H-4	0.159942	0.10579	0.131512	0.0223746	0.012918	F3'5'H-1	0	0	0	0	0	F3'H-1	0	0	0	0	0	F3'5'H-2	0	0	0	0	0	F3'H-2	0.234032	0.154795	0.130599	0.0475939	0.0274784
	Bw2	Ubi	0.12886	1.44488		F3'5'H-4	0.205569	0.142274				F3'5'H-1	0	0				F3'H-1	0	0				F3'5'H-2	0	0				F3'H-2	0.232963	0.161234
	Bw3	Ubi	0.0761894	0.85429		F3'5'H-4	0.12513	0.146472				F3'5'H-1	0	0				F3'H-1	0	0				F3'5'H-2	0	0				F3'H-2	0.0647282	0.0757684
	Plp1	Ubi	0.160306	1.79747		F3'5'H-4	0.433527	0.241188	0.236522	0.0461294	0.0266328	F3'5'H-1	0	0	0	0	0	F3'H-1	0	0	0	0	0	F3'5'H-2	0	0	0	0	0	F3'H-2	0.816299	0.454139	0.359482	0.0876954	0.050631
	Plp2	Ubi	0.212058	2.37775		F3'5'H-4	0.666106	0.280141				F3'5'H-1	0	0				F3'H-1	0	0				F3'5'H-2	0	0				F3'H-2	0.816299	0.343308
	Plp3	Ubi	0.193629	2.17111		F3'5'H-4	0.408683	0.188237				F3'5'H-1	0	0				F3'H-1	0	0				F3'5'H-2	0	0				F3'H-2	0.610081	0.281
		F3'H-1		F3'H-2		F3'5'H-1		F3'5'H-2		F3'5'H-4
			stdev		stdev		stdev		stdev		stdev
aleurone layer	BW	0.159068	0.0355684	0	0	0.42446	0.142631	1.18288	0.146252	0.0776218	0.0171788
	BA	0.169053	0.0557538	0	0	15.1578	0.876072	0.15071	0.209161	0.0393549	0.00891166
pericarp	BW	0.174863	0.0698666	0	0	0	0	1.46587	0.541425	0.0749457	0.0300557
	PLP	0.568691	0.195622	0	0	0	0	0.186811	0.140692	0.0588211	0.0801732
lemma	BW	0.0320267	0.0336145	0	0	0	0	0.0877822	0.0781553	0.0291798	0.0306513
	PLP	0.125982	0.0293984	0	0	0	0	0.0266476	0.0461551	0.0531323	0.0193523
stem	BW	0	0	0.130599	0.0475939	0	0	0	0	0.131512	0.0223746
	PLP	0	0	0.359482	0.0876954	0	0	0	0	0.236522	0.0461294
